# Supplementary material for: Ciprofloxacin degradation from aqueous solution by Fenton oxidation: reaction kinetics and degradation mechanisms
Source: Royal Society of Chemistry journal article supplement (doi:10.1039/c3ra45709e), 2014-01-01
Supplement: c3ra45709e.pdf [file c3ra45709e.pdf]

## Supplementary Information

### Ciprofloxacin degradation from aqueous solution by Fenton oxidation: Reaction kinetics and degradation mechanisms

Ardhendu Sekhar Giri and Animes Kumar Golder

**Table S1**

Daughter ions formation in CIP degradation by FO.

| Daughter ions   | Molecular Formula                                               | m/z (MH <sup>+</sup> ) | Degradation route                                                             |
|-----------------|-----------------------------------------------------------------|------------------------|-------------------------------------------------------------------------------|
| D <sub>1</sub>  | C <sub>15</sub> H <sub>16</sub> O <sub>3</sub> N <sub>3</sub> F | 305                    | Partial piperazine ring cleavage                                              |
| D <sub>2</sub>  | C <sub>15</sub> H <sub>17</sub> O <sub>4</sub> N <sub>3</sub>   | 304                    | Defluorination followed by hydroxylation of D <sub>1</sub>                    |
| D <sub>3</sub>  | C <sub>13</sub> H <sub>11</sub> O <sub>4</sub> N                | 239                    | Complete piperazine ring cleavage of D <sub>2</sub>                           |
| D <sub>4</sub>  | C <sub>13</sub> H <sub>15</sub> O <sub>2</sub> N <sub>3</sub> F | 304                    | Decarboxylation of CIP                                                        |
| D <sub>5</sub>  | C <sub>13</sub> H <sub>16</sub> O <sub>3</sub> N <sub>3</sub>   | 301                    | Defluorination followed by hydroxylation of D <sub>4</sub>                    |
| D <sub>6</sub>  | C <sub>16</sub> H <sub>16</sub> ON <sub>3</sub> F               | 287                    | Dehydroxylation of D <sub>1</sub>                                             |
| D <sub>7</sub>  | C <sub>11</sub> H <sub>10</sub> ON <sub>2</sub>                 | 186                    | Partial piperazine ring breaking followed by defluorination of D <sub>6</sub> |
| D <sub>8</sub>  | C <sub>11</sub> H <sub>12</sub> O <sub>2</sub> N <sub>2</sub>   | 205                    | Hydroxylation of D <sub>7</sub>                                               |
| D <sub>9</sub>  | C <sub>11</sub> H <sub>12</sub> ON <sub>2</sub>                 | 198                    | Cleavage of cyclic amine of D <sub>7</sub>                                    |
| D <sub>10</sub> | C <sub>11</sub> H <sub>10</sub> O <sub>2</sub> N <sub>2</sub>   | 217                    | Hydroxylation of D <sub>9</sub>                                               |
| D <sub>11</sub> | C <sub>14</sub> H <sub>14</sub> O <sub>2</sub> N <sub>2</sub>   | 242                    | Partial piperazine ring breaking followed by defluorination of D <sub>1</sub> |
| D <sub>12</sub> | C <sub>14</sub> H <sub>14</sub> O <sub>2</sub> N <sub>2</sub> F | 261                    | Partially piperazine ring cleavage of D <sub>1</sub>                          |
| D <sub>13</sub> | C <sub>14</sub> H <sub>16</sub> O <sub>3</sub> N <sub>2</sub> F | 279                    | Hydroxylation followed by protonation of D <sub>12</sub>                      |

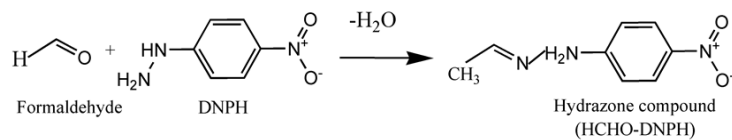

**Fig. S1** Formation of hydrazone colored derivative by the reaction between HCHO and DNPH.

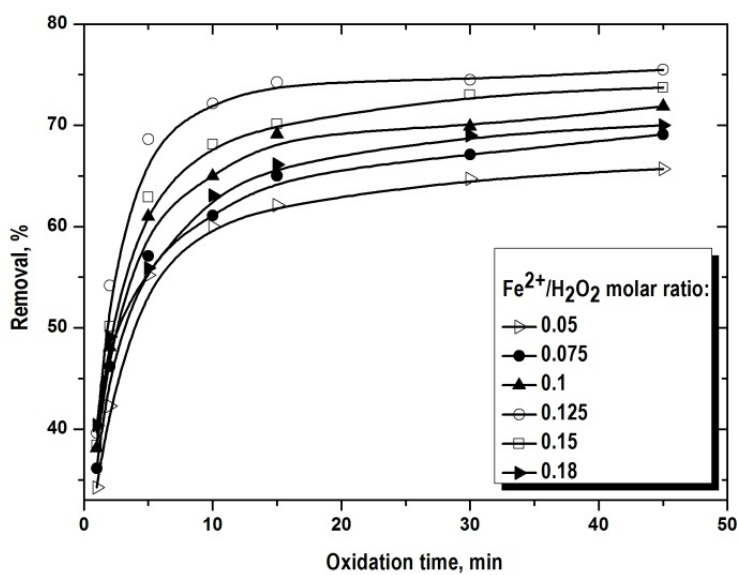

**Fig. S2** Dynamics of drug degradation with the variation of  $\text{Fe}^{2+}/\text{H}_2\text{O}_2$  molar ratio. Experimental conditions:  $[\text{CIP}]_0 = 15 \text{ mg/L}$ ,  $\text{pH} = 3.5$  and temperature =  $25^\circ\text{C}$

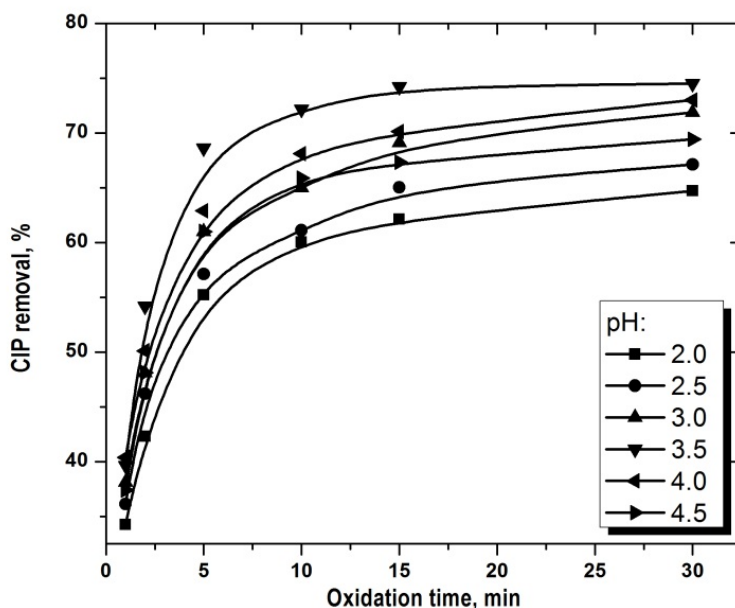

**Fig. S3** Effect of pH on % CIP degradation at 3.5 pH. Experimental conditions:  $[CIP]_0 = 15$  mg/L,  $Fe^{2+}/H_2O_2$  molar ratio = 0.125 and temperature = 25°C.

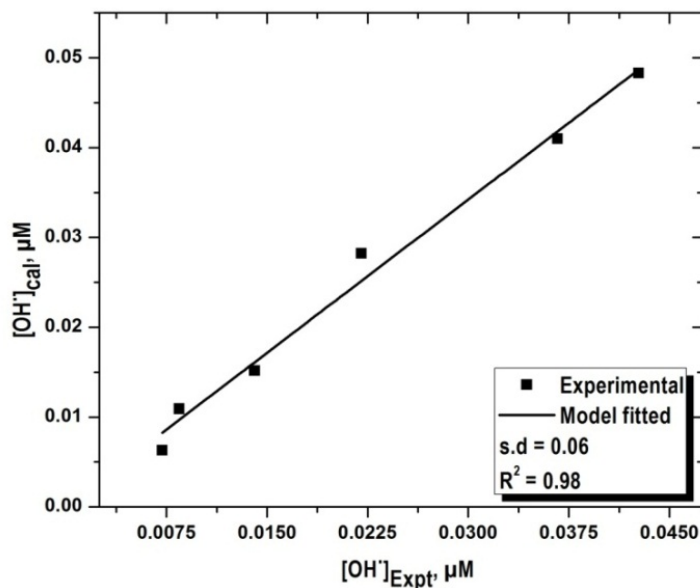

**Fig. S4** Experimental vs. model predicted (eqns (17) to (20)) concentration of  $OH^\cdot$ . Experimental conditions:  $[CIP]_0 = 15$  mg/L,  $Fe^{2+}/H_2O_2$  molar ratio = 0.125, pH = 3.5 and temperature = 25°C.

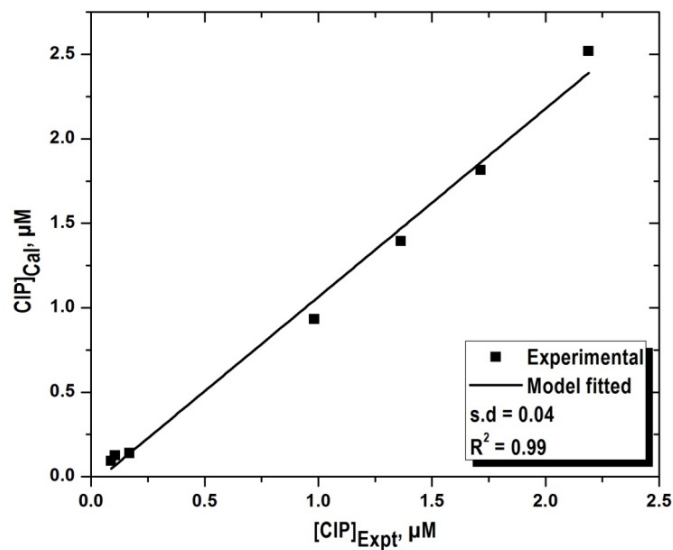

**Fig. S5** Experimental vs. model predicted (eqns (17) to (20)) CIP degradation. Experimental conditions:  $[CIP]_0=15$  mg/L,  $Fe^{2+}/H_2O_2$  molar ratio = 0.125, pH = 3.5 and temperature = 25°C.

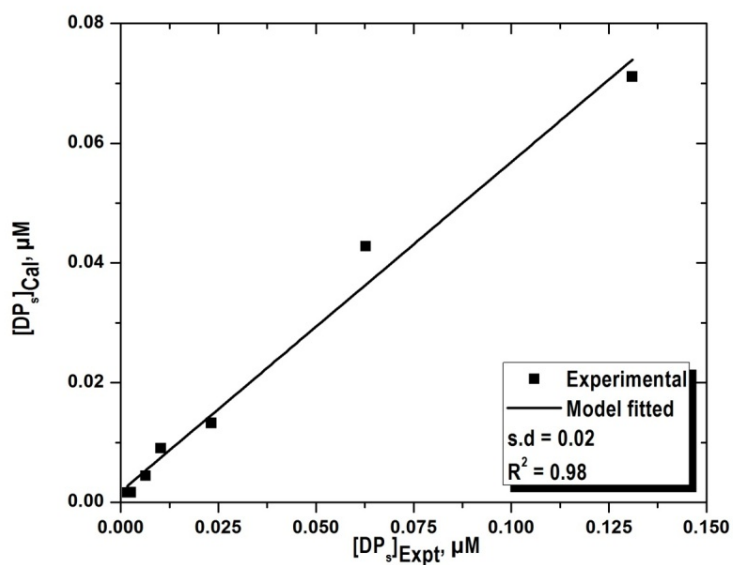

**Fig. S6** Experimental vs. model predicted (eqns (17) to (20)) degradation products (DPs). Experimental conditions:  $[CIP]_0 = 15$  mg/L,  $Fe^{2+}/H_2O_2$  molar ratio = 0.125, pH = 3.5 and temperature = 25°C.
